# Supplementary material for: NF-κB p100 limits TNF-induced bone resorption in mice by a TRAF3-dependent mechanism
Source: JCI journal article supplement (doi:10.1172/jci38716), 2009-09-17

**Supplemental figure. TNF-induced activation of RelB and p65 in OCPs is independent of NF- $\kappa$ B2.** (A) Nuclear and cytoplasm proteins extracted from WT or *nfkb2*<sup>-/-</sup> mouse OCPs treated with RANKL (10ng/ml) or TNF (20ng/ml) for 8h were subjected to Western blot analysis for RelB. (B) WT mouse OCPs were treated with RANKL and/or TNF for the indicated times. Nuclear and cytoplasm protein extracts were subjected to Western blot analysis for p52, RelB, p65 and p50. (C) WT and *nfkb2/1* dKO mouse OCPs were serum-deprived for 4h and then treated with PBS, RANKL(10ng/ml) and TNF (20ng/ml) for 15 minutes and 4 hours, respectively. The cells were fixed with 10% formalin and then were immunostained with antibodies to p65 (20x). P=PBS; R=RANKL; T=TNF.

**Supplemental figures. TNF-induced activation of RelB and p65 in OCPs is independent of NF- $\kappa$ B2.**

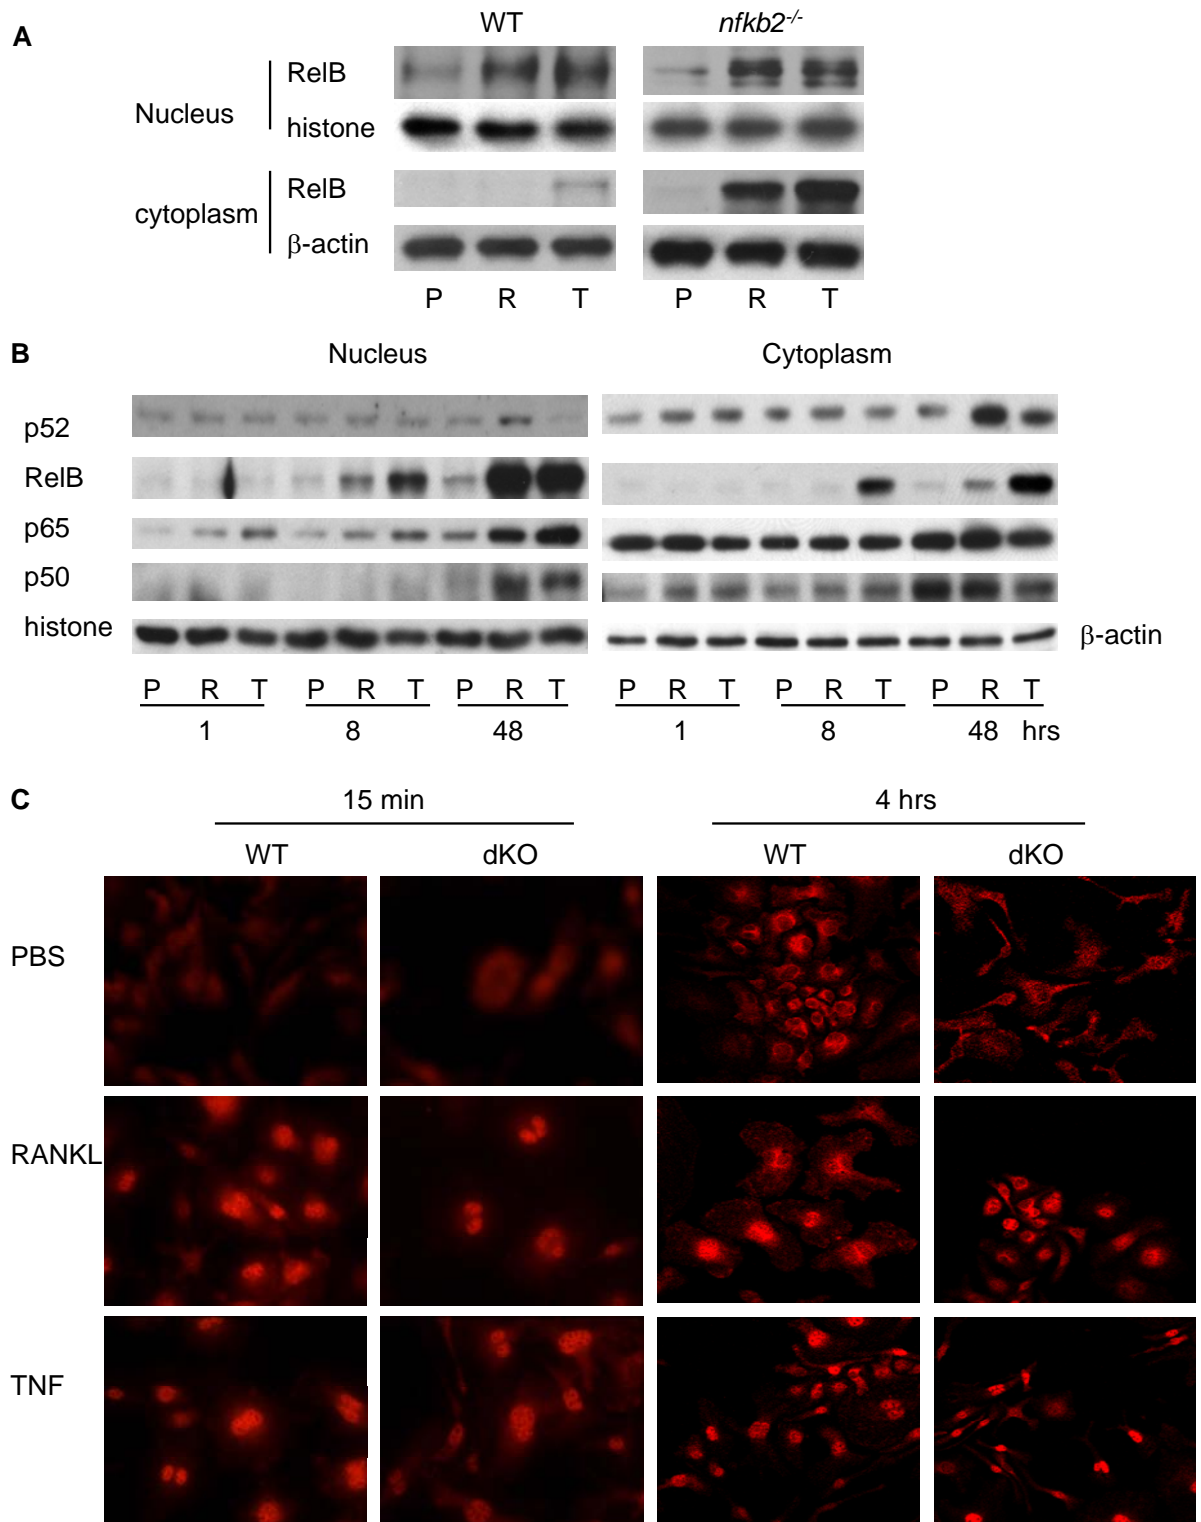

Supplement: sd1 [file 1]
